# Supplementary material
Source: Springer Nature journal article supplement (https://www.springerprofessional.de/resource/supplementary/13638_2013_993_MOESM2_ESM.pdf/11899132)

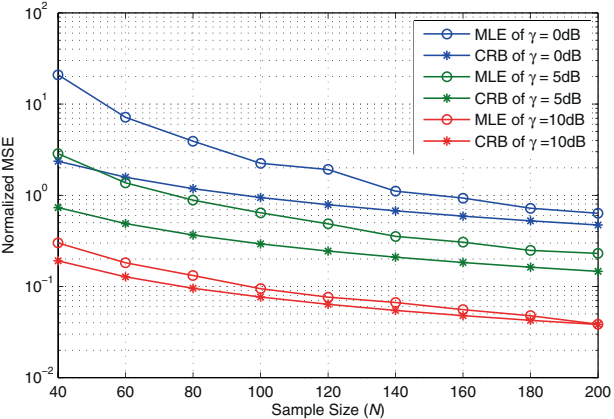

(a) PAM

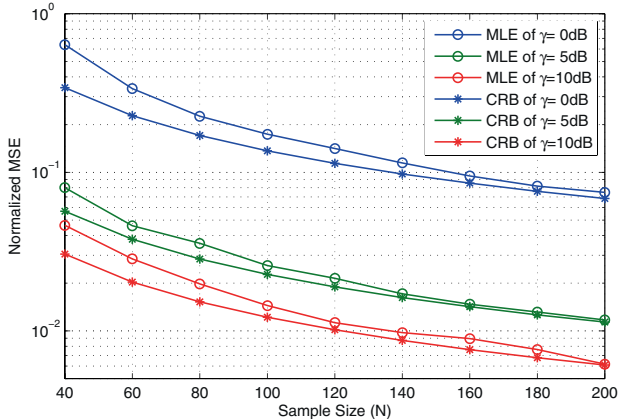

(b) QPSK

Supplement: MOESM2 [file 11899132]
